# Supplementary material for: Structural insights into RNA unwinding and degradation by RNase R
Source: PubMed Central journal article supplement — Nucleic Acids Res. 2017 Oct 3;45(20):12015–24. doi: 10.1093/nar/gkx880 (PMC5714204; doi:10.1093/nar/gkx880), 2017-10-03
Supplement: gkx880_supp.pdf [file gkx880_supp.pdf]

## **Supplementary Information**

### **Structural insights into RNA unwinding and degradation by RNase R**

Lee-Ya Chu, Tung-Ju Hsieh, Bagher Golzarroshan, Yi-Ping Chen,  
Sashank Agrawal and Hanna S. Yuan

This document includes:  
Supplementary Figures S1-S4

*E. coli*\_RNase\_R  
*E. coli*\_RNase\_R  
*E. coli*\_RNase\_II  
yeast\_Rrp44  
mouse\_Dis312  
Human\_Dis3  
Human\_Dis311  
Human\_Dis312

```

1 MSVPAIAPRRKRLADGLSVIQKVFVRSRNGGATKIVREHYLRSDIPCLSRSCCTKCPQIVVPAQNELPKF
1 .....MLKSKTFLKKTTRAGGVMMKIVREHYLRDDIGCGAPGCAACGGAGHEGPALEPQPQ.
1 .....MLQKREKVLRLRTFQGRITLRIIVREHYLRPCVPCHSPLCPQPAACSH.....

```

*E. coli*\_RNase\_R  
*E. coli*\_RNase\_R  
*E. coli*\_RNase\_II  
yeast\_Rrp44  
mouse\_Dis312  
Human\_Dis3  
Human\_Dis311  
Human\_Dis312

```

71 IISDSPLELSAPIGKHYVLDTNVVLQAIDLLENPNCFFDVIVPQIVLDEVR.NKSYVYVYTRRLTLCRDS
54 .....DPASSVCPQPHYLLPDTNVLLHQIDVLEDPAT.RNVIVLQIVLQEVN.NRSAPVYKRIKRDVTNNO
47 .....DGKLLSSDVTHYVIPDQVQDYLEILEFPEL.KGIIFMQTACQAVQHQRGRQRQYKLRNLLKDA

```

*E. coli*\_RNase\_R  
*E. coli*\_RNase\_R  
*E. coli*\_RNase\_II  
yeast\_Rrp44  
mouse\_Dis312  
Human\_Dis3  
Human\_Dis311  
Human\_Dis312

```

140 DDHKRFIVFHNEFSEHTFVERLPNETINDRNDRAIRKTCQWYSEHLKPYD... INVVLVTNDRNLNREAA
117 ..EKHFYFTTNEHHRETYYVEQEQENANDRNDRAIRVAAKWYNEHLKMSADNQLQVIFITNDRNRKEKA
111 ..RHDCILFANEFAQCCYLPRERGESMEKQWTRSIYNAAVWYHHCQDR... MPIVMVTEDEEAIQQY

```

*E. coli*\_RNase\_R  
*E. coli*\_RNase\_R  
*E. coli*\_RNase\_II  
yeast\_Rrp44  
mouse\_Dis312  
Human\_Dis3  
Human\_Dis311  
Human\_Dis312

```

206 TKEVESNIITKSL...VOYIE.....LLPNADDIRDSIPQMDSFDKDLERDTFSDFTFPEYYSTAR
1 .....MNHDPDYKLNLRSPGTPRGVSSVVGPSAVGASPG..DKSKNKSMRGKKKSIFFETYMSKED
185 IEEG...IPAFTC...EEYVK.....SLTANPELIDRLACLSEEGNE...IESGKIIFSEHLPLSK
174 GSETEG.VFVITPKNYLDNFWP.....DLKAAHELCDSILQSRRE.RENESQESHGKEYPEHLPLSK
1 .....MSHPDYRMNLRPLGTTPRGVSAVAGPHDIGASPG..DKSKNRSTRGKKKSIFFETYMSKED

```

*E. coli*\_RNase\_R  
*E. coli*\_RNase\_R  
*E. coli*\_RNase\_II  
yeast\_Rrp44  
mouse\_Dis312  
Human\_Dis3  
Human\_Dis311  
Human\_Dis312

```

1 .....MSQDPFQEREA.....KYANPIPSREFILEHLTKREKPARSDELAVELHIEGE
264 VMGGLKNGVLYQGNIQISEYN.FLEGSVS...LPR...FSKPVLIQVQKLNLRNRAFNGDQVIVLLELPQSE
59 VSEGLKRGTLIQGLRINPKK.FHEAFIP.....SPDGRDIFIDGVVARNRNLNGDLVVVKLLPEEQ
237 LQQGIKSGTYLQGTFRASREN.YLEATVW.....IHGDNEENKEIILQGLKHLNRAVHEDIVAVELLPKSQ
234 LEAGIKSGRYIQGILNVNKHRAQIEAFVRLQGASSKSDSLVSDILIHGMKARNRSIHGDVVVVELLPKNE
59 VSEGLKRGTLIQGLRINPKK.FHEAFIP.....SPDGRDIFIDGVVARNRNLNGDLVVVKLLPEEH

```

*E. coli*\_RNase\_R  
*E. coli*\_RNase\_R  
*E. coli*\_RNase\_II  
yeast\_Rrp44  
mouse\_Dis312  
Human\_Dis3  
Human\_Dis311  
Human\_Dis312

```

50 EQLEGLRRRLR.....AMERDQGLVFTRRQCYALPERLDLVKGTIVIGHR
1 .....MFQDNPLLAQLK..QQLHSQTPRAEGVVKATE
326 W..KAPSSIVLDSSEHFD..V.....NDNPDIEAGD.....DDNNNESSS...
121 W..KAVKPESNDKEIEATYEADIPEEGCGHHPLQQSRKQWS.GPDVIEAQFDDSDSEDRHGNTS.GLV
302 W..VAPSSVVLHDEGQN..E.....EDVE...KEE.....
304 W..KGRTVALCENDCDD..K.....
121 W..KVVKPESNDKEIEAAYESDIPEELCGHHLPQQSLKSYNDSPDVIVEAQFDGS.DSEDDGHGITQNVLV

```

*E. coli*\_RNase\_R  
*E. coli*\_RNase\_R  
*E. coli*\_RNase\_II  
yeast\_Rrp44  
mouse\_Dis312  
Human\_Dis3  
Human\_Dis311  
Human\_Dis312

```

94 DGYGFLRVE...GR..KDDLYLSSEQMKTICIHGDQVLAQPLGADRKGRREARIVRVVLPKTSQIVGRYF
31 KGFGLFLEVD...AQ..K.SYFIPPPQMKKVMHGDRIIAVIHSEKERES..AEPEELVEPFLTRFVGVKQV
361 .....NTTVISDKQRRLLAKDAMIQRSS...KKIQPTAKVVYIQRRSWRQYVVGQLA
186 DGVKKLSISTPDRGKEDSSTPVMKDE..NTPIPQDTRGLSE...KSLQKSAKVVYIIEKKHSRAATGIL
325 .....ETERML...KTAVSE...KMLKPTGRVVVGIKRNWRPYCGMLS
320 .....ASGESP...SEPMPTGRVVVGIKKNWRDYVVTFF
188 DGVKKLSVVCVSEKREDDGAPVTKDE..TTCISQDTRALSE...KSLQRSKVVYIIEKKHSRAATGFL

```

## CSD1

Figure S1 (part 1)

*E. coli*\_RNase\_R

β7 → TT β8 → η2 β9 → β10

158 TEA.....GVGFVVPDDSRLSFDLIPDPQIM...GARM...GVVVVELTQRPTRRTKAVGKIV  
*E. coli*\_RNase\_R 92 GKN.....DRLAIVDPDHPKLDK...IPCRAAR...GLNHEFKEGDWAEMRRHPLKGDERSFY...  
*E. coli*\_RNase\_II 92 .PSSVDPQSSSTQNVFVILMDKCLP.KVRIARRA.....AELLDRRIVISIDSWPTTHKYPLGHFV  
 yeast\_Rrp44 409 KLLADKNSDLFKKYALFSPSDHRVP.RIYVPLKDCPQDFMTRPKDFANLFCIRIIDWKEDCNFALGQLA  
 mouse\_Dis312 250 .KSDIKES...RRHLFTPADKRIP.RIRIETRQA.....STLEGRRIVAIIDGWPNRSRYPNGHFV  
 Human\_Dis3 362 SKKEEVQSQGKNAQKILVTPWDYRIP.KIRISTQQA.....ETLQDFRVVVRIDSWESTSVYPNGHFV  
 Human\_Dis311 351 KLLADKNSELFRKYALFSPSDHRVP.RIYVPLKDCPQDFVARPKDYANTLFCIRIVDWKEDCNFALGQLA  
 Human\_Dis312 252

### CSD2

*E. coli*\_RNase\_R

α1 α2 α3 β11

212 EVLGDNMGITGMAVDIALRTHPEYIWPQAVEQQVAGLKEEVPE...E.....AKAGRVVDL  
*E. coli*\_RNase\_R 145 .....AELTQYITFGDDHFVPPWVILARH...NLEKEAPD...GV.....ATEMLDEGLVREDL  
*E. coli*\_RNase\_II 145 RDLGITFESAQAETEALLLEHDVEYRP..FSKKVLECLPAEG..HDWKAPTKLDDEPAVSKDPLLLTKRDL  
 yeast\_Rrp44 469 KSLGQAGEIEPETEGILTEYGVDFSD..FSSEVLECLPQSL...PWTIPP.....DEVGKRDL  
 mouse\_Dis312 319 RNLGDVGEKETETEVLLLEHDVPHQP..FSQAVLSFLPKMP...WSIT.....EKDMKNREDL  
 Human\_Dis3 418 RVLGRIQDLEGEIATILVENSISVIP..FSEAQMCEMPVNTPESPKWKVSP.....E.EEQKRDL  
 Human\_Dis311 412 KSLGQAGEIEPETEGILTEYGVDFSD..FSSEVLECLPQGL...PWTIPP.....E.EFSKRDL  
 Human\_Dis312 321

*E. coli*\_RNase\_R

T.T β12 → TT β13 → TT β14 → α4 β15 → TT β16

264 R.DLPLVTIDGEDARDFDDAVYCEKRRGGWRWVATADVSYYVVRPSTPLDREARNRGTSVYFSPQVIPM  
*E. coli*\_RNase\_R 193 T.ALDFVITDSASTEDMDALFAKALPDKLQILVAIADPTAWIAEGSKLDKAAKIRAFNIVLPGFNIPM  
*E. coli*\_RNase\_II 193 R.DKLCISIDPPGCVDDALHAHKPLNGNWEVGVHIADVTHFVKPGTALDAEGAAARGTSVYLVQKRIDM  
 yeast\_Rrp44 535 R.KDCIFTIIDPSTARDDALHACRRLLDGTFEVGVHIADVSYYVVRPSTPLDREARNRGTSVYLVQKRIDM  
 mouse\_Dis312 373 R.HLCLCSVDPPGCTDDALHCRELENGNLEVGVHIADVSHFRPAGNALDQESARRGTIVLCEKRIDM  
 Human\_Dis3 471 RKSHLVFSDPKGCEVDLTSVRTLNNGNLELGVHIADVTHFVAPNSYDIEARTRATTIYVLADRIDM  
 Human\_Dis311 469 R.KDCIFTIIDPSTARDDALSCCKPLADGNFKVGVHIADVSYYVVRPSTPLDREARNRGTSVYLVQKRIDM  
 Human\_Dis312 375

*E. coli*\_RNase\_R

α6 β17 → TT β18 → β19 α7 α8

333 IFEVLSNGLCSTNPQVDRLCMVCMTVSSKGRITG.YKFFEAVMSHARLTYTKVWHILQGDQDLREQ..  
*E. coli*\_RNase\_R 262 IPRELSDDLCSFRANERVRPLACRMTLSADGTIEDNIEFFAATIESKAKLVYDQVSDWLENTGDWQPE...  
*E. coli*\_RNase\_II 262 IPEMLGTDLCSFKPYVDRFAFVSEWELDDSA.NIVNVNFMKSVIRREAFSYEQALRIDDKTQ...  
 yeast\_Rrp44 604 VPELSSNLCSFTKCDVDRLAFSCIWEMNHNA.EILKTKFTKSVINSKASLTYAEAQLRIDSANM...  
 mouse\_Dis312 442 IPELSSNLCSFTKCDVDRLAFSCIWEMNHNA.EILKTKFTKSVINSKASLTYAEAQLRIDSANM...  
 Human\_Dis3 540 IPELSSNLCSFTKCDVDRLAFSCIWEMNHNA.EILKTKFTKSVINSKASLTYAEAQLRIDSANM...  
 Human\_Dis311 539 IPELSSNLCSFTKCDVDRLAFSCIWEMNHNA.EILKTKFTKSVINSKASLTYAEAQLRIDSANM...  
 Human\_Dis312 444 IPELSSNLCSFTKCDVDRLAFSCIWEMNHNA.EILKTKFTKSVINSKASLTYAEAQLRIDSANM...

### RNB

*E. coli*\_RNase\_R

α9 β20 → TT β21 → α10

400 .....YAPLVKHLEETHNLYKVLDAKREERGGISFSEEAKFIFNAERR.IERIEQQRNDIA  
*E. coli*\_RNase\_R 330 .....SEATAEQVRLTAQICQRRGKWRHNNHALVFKDRPDYRFILGEGKE.VLDIVAEPRRIA  
*E. coli*\_RNase\_II 330 .....NDELTMGMRAITLKLSSVKLQKRLAAGALNLSPEVVMDSSTDPNEVEIKKLLAT  
 yeast\_Rrp44 667 .....EELPPISEPHSVVEVHQAVNLTHSIAKQLRQRFFVDGALRLDQLKLAFTLDHETGLPQGCHIEYRDS  
 mouse\_Dis312 569 .....NDDITTSRLRINKLAKLKKRRIEKGALTLSSPEVRFHMDSETDHPIDLQTKELRET  
 Human\_Dis3 603 EFKDLDKSRQAKLEELVWVAIGKTDIARHVRARDDGCGALELEGVEVCVQLDDKKN.IHDLIPKQPLEV  
 Human\_Dis311 609 .....KELPPISEPHSSVEVHQAVNLTHGIAKQLRQRFFVDGALRLDQLKLAFTLDHETGLPQGCHIEYRDS  
 Human\_Dis312 511

*E. coli*\_RNase\_R

α10 β22 → α11 TT α12

456 HKLIEECMILANISARFVEK.AKEPALFRIBDKPSTEAITSFRRSVLA.ELGLELPGGNKPEPRDYAELL  
*E. coli*\_RNase\_R 386 NRIVEEAMIANICAAARVLRD.KLFGFIYNVHMGFDPANADALAALK.THGLHVDAAEEVLTLDGFCKLR  
*E. coli*\_RNase\_II 386 NSLVEEMLLANISVARKIYDAPQATMLRRHAAPPSTNFEILNEMLNTRKNMSISLESSKALADSLDR  
 yeast\_Rrp44 724 NKLVEEMLLANISVAKKIHEEFSEHALLRKHPPAPPSPNYEILVKAAR.SRNLEIKTDTAKLSAESLDQA  
 mouse\_Dis312 577 NSMVEEMLLANISVAKKIHEEFSEHALLRKHPPAPPSPNYEILVKAAR.SRNLEIKTDTAKLSAESLDQA  
 Human\_Dis3 660 HETVAECMILANHWVAKKIWESEFPHQALLRQHPPPHQEFFSELECAK.AKGFIDTRSNKTLADSLDNA  
 Human\_Dis311 678 NKLVEEMLLANMAVAHKIHRAPPEQALLRRHPPPQTRMLSDLVVEFC.D.QMGLPVDVFSSAGALNKSILTQT  
 Human\_Dis312 579

### Δ3H

*E. coli*\_RNase\_R

α13 β23 α14

524 ESVAD..RPDAEMLQTMLLRRSMKQAIY.....DPENRGHFGTALQSYAHFTSPIRRYDLDLTHRAIKY  
*E. coli*\_RNase\_R 454 RELDA..QPT.GFLDSRIRRFQSFSAEI.....STEPGFHFGGLEAVATWTSPIRKYDMDINHRLLKA  
*E. coli*\_RNase\_II 454 VDPE..PYFNTLVIRIMSTRCMMAAQYFSGAYS.Y.PDFRHYGTAVDIYTHFTSPIRRYDLDLTHRAIKY  
 yeast\_Rrp44 794 FGDDKYSLARKEVLTNMYSRPMQALYFCSGMQLQDQEFRHYA..NVPLYTHFTSPIRRYDLDLTHRAIKY  
 mouse\_Dis312 646 ESPTF..PYLNTLLRILATRCMMAAQYFCSGMQLQDQEFRHYA..NVPLYTHFTSPIRRYDLDLTHRAIKY  
 Human\_Dis3 729 NDPHD..PIVNRLLRSMATQAMSNALYFSTGSCAE.EEFHYHGTALDKYTHFTSPIRRYDLDLTHRAIKY  
 Human\_Dis311 747 FGDDKYSLARKEVLTNMYSRPMQALYFCSGMQLQDQEFRHYA..NVPLYTHFTSPIRRYDLDLTHRAIKY  
 Human\_Dis312 648

Figure S1 (part 2)



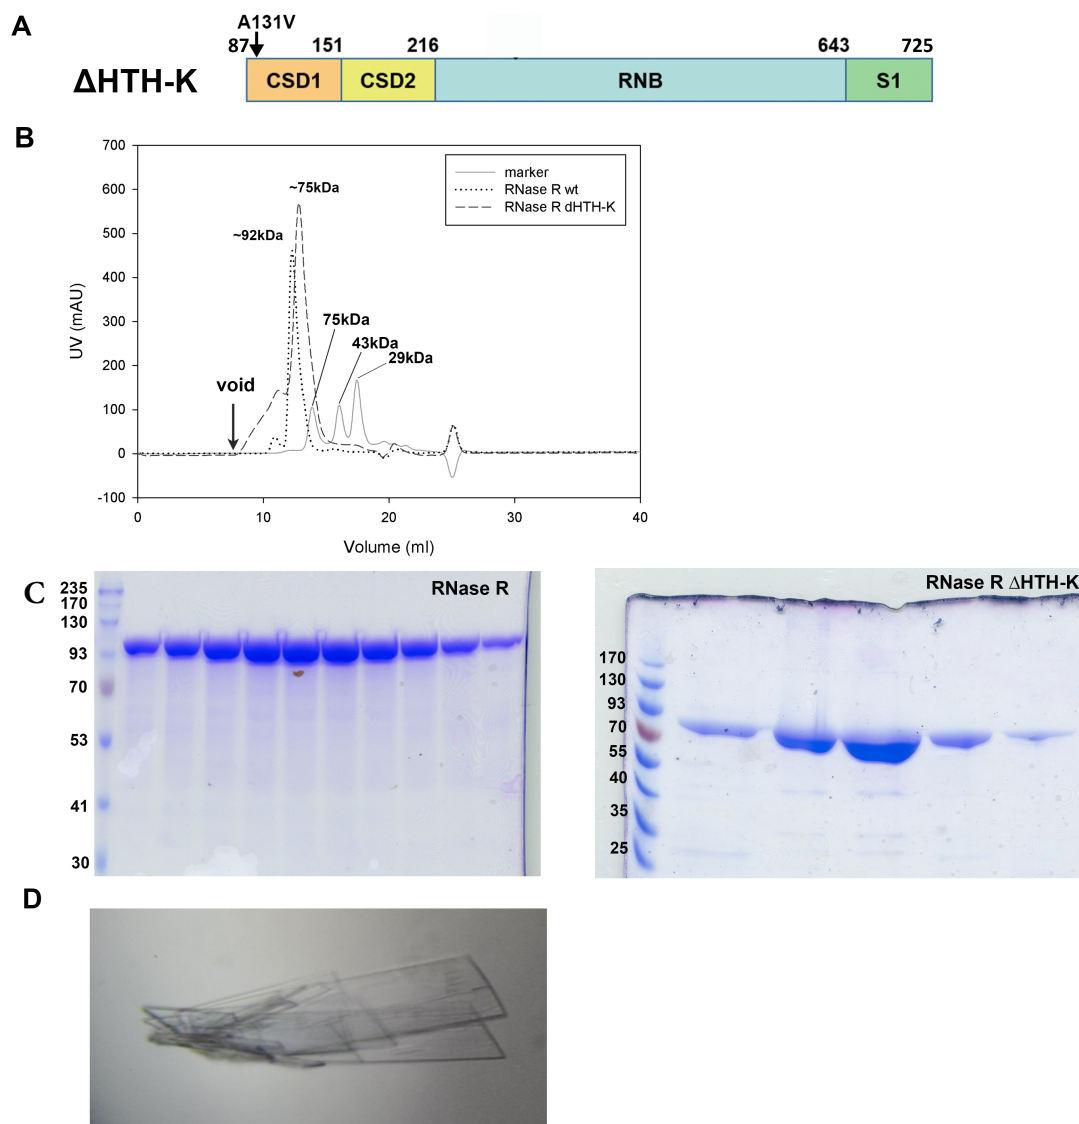

**Figure S2. Purification and crystallization of RNase R  $\Delta$ HTH-K.** (A) Domain structure of the truncation mutant RNase R  $\Delta$ HTH-K. (B) Gel filtration profiles (GE HealthCare, Superdex 200 Increase 10/300 GL) of the full-length RNase R and  $\Delta$ HTH-K. (C) SDS-PAGE of the purified recombinant RNase R and  $\Delta$ HTH-K. (D) Crystals of RNase R  $\Delta$ HTH-K.

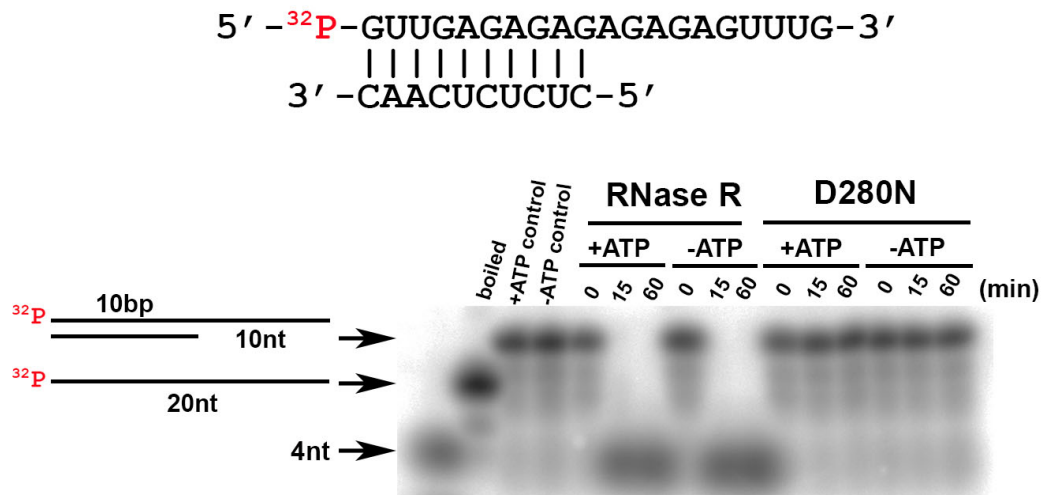

**Figure S3. Duplex RNA with a 3' overhang could not be unwound by RNase R D280N mutant in the presence of ATP.** A 10-bairpair double-stranded RNA with a 10-nucleotide 3' overhang (2.5 nM) was incubated with RNase R or D280N mutant (100 nM) in the presence or absence of ATP. The wild-type RNase R unwound and degraded dsRNA, however, RNase R D280N mutant could not unwind the duplex RNA in the presence of ATP. The RNA substrate was annealed by mixing a 5'-end <sup>32</sup>P-labeled 20-nucleotide RNA with a sequence of 5'-<sup>32</sup>P-GUUGAGAGAGAGAGAGUUUG-3' with a 10-nucleotide RNA with a sequence of 5'-CUCUCUCAAC-3' at 95°C for 5 minutes in a buffer of 20 mM HEPES (pH 7.4), 50 mM NaCl and 2 mM MgCl<sub>2</sub>, followed by gradual cooling to room temperature over 2 hours. The duplex RNAs were unwound by boiling the sample (see the marker lanes). Full-length RNase R or D280N mutant (100 nM) was incubated with the duplex RNA (2.5 nM) in a buffer containing 20 mM Tris-HCl (pH 7.5), 100 mM NaCl, 1 mM DTT and 0.25 mM MgCl<sub>2</sub>, with or without 5 mM ATP at 37°C for 0-60 minutes. Reactions were stopped by adding 2 mg/ml Protease K and 25 mM EDTA at different time points as indicated in the figure. After the reaction, 6X DNA loading dye (30% (v/v) glycerol, 0.25% (w/v) bromophenol blue, 0.25% (w/v) xylene cyanol FF) was added and the samples were loaded on a 20 % TBE gel for gel-electrophoresis.

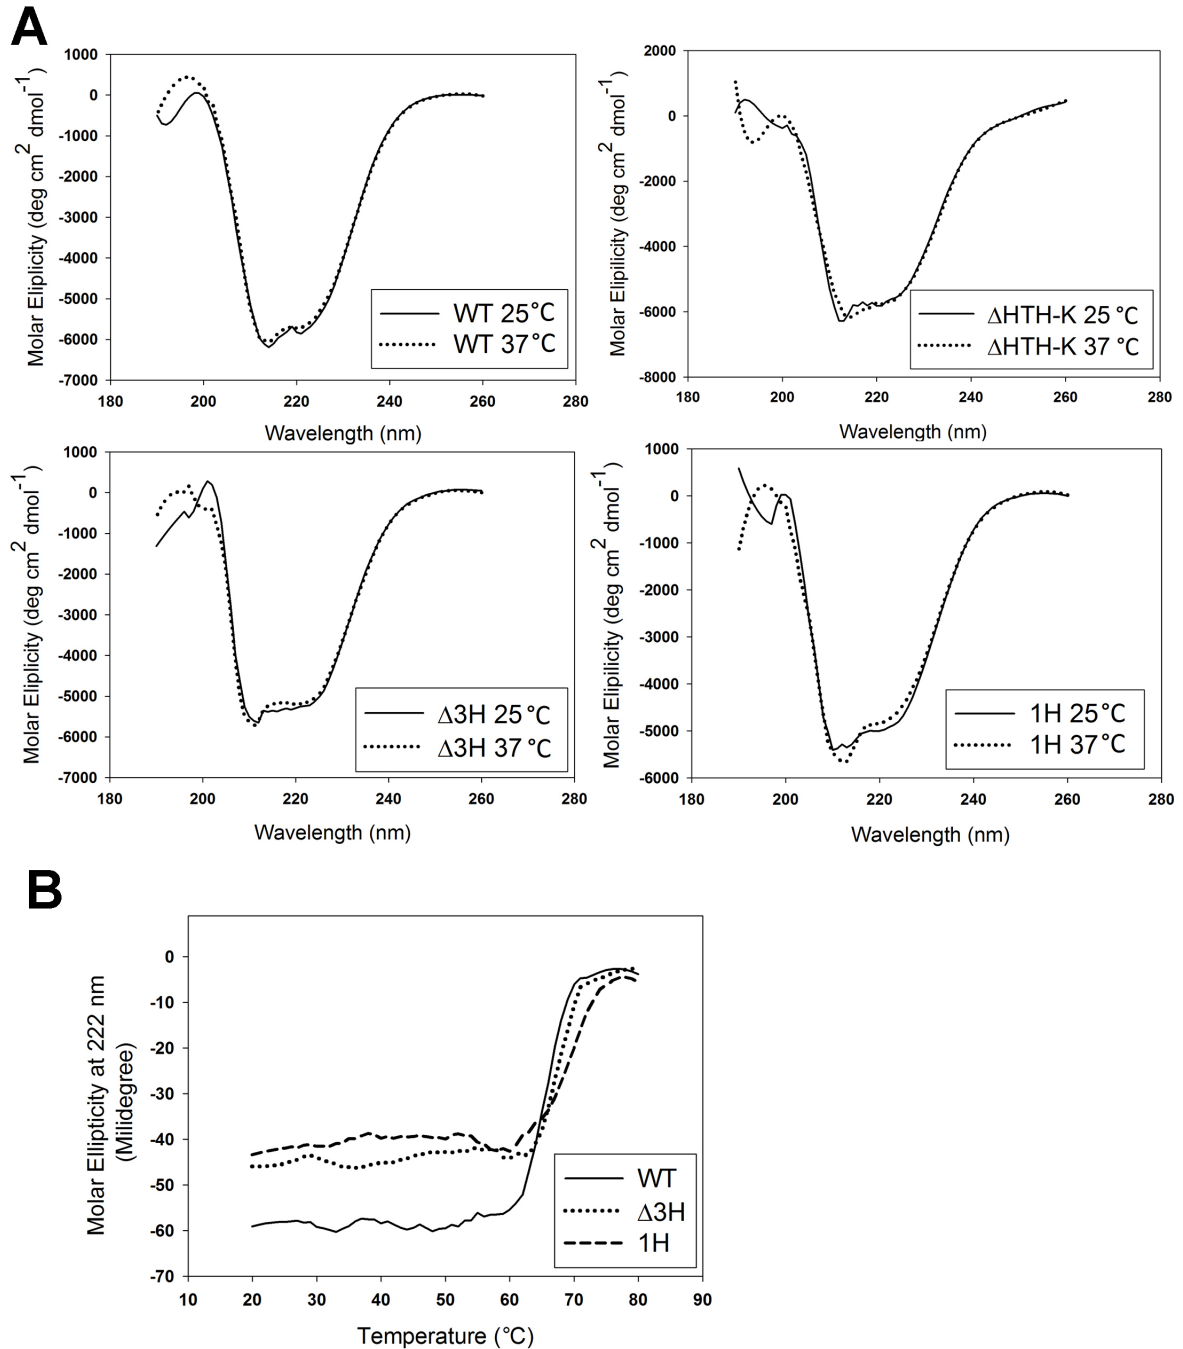

**Figure S4. The CD spectra and thermal melting assays of the RNase R proteins.**

(A) The CD spectra of RNase R,  $\Delta$ HTH-K,  $\Delta$ 3H and 1H mutants were recorded by AVIV CD400 spectrometer at 25°C and 37°C. (B) Thermal melting temperatures for RNase R,  $\Delta$ 3H and 1H were determined by measuring the ellipticity at 222 nm as a function of temperature from 20 to 80°C. The thermal melting points were 65.7°C for RNase R, 68.0°C for  $\Delta$ 3H, and 70.0°C for 1H mutant. The protein concentration used in the CD measurements were 10  $\mu$ M in a buffer of 50 mM Tris-HCl pH 7.5 and 500 mM NaCl. Measurements were taken three times and averaged.
